# Supplementary material
Source: publisher site journal article supplement (https://www.dovepress.com/article/422263)
Supplement: Supplementary file 1 [file get_supplementary_file.php]

**Table S1**. Optimal family context group discriminate indexes list

| Class number | AIC | BIC | aBIC | Entropy | χ2 |
| --- | --- | --- | --- | --- | --- |
| 2 | 119813.615 | 120126.767 | 119983.766 | 0.986 | 44661.342 |
| 3 | 113642.172 | 114115.379 | 113899.289 | 1.000 | 33530.495 |
| 4 | 110015.943 | 110649.205 | 110360.026 | 1.000 | 25116.680 |
| 5 | 107215.055 | 108008.372 | 107646.104 | 1.000 | 19271.975 |
| 6 | 106000.671 | 106954.044 | 106518.686 | 0.955 | 16911.601 |
| 7 | 105382.937 | 106496.365 | 105987.918 | 0.959 | 15382.966 |
| 8 | 104855.929 | 106129.412 | 105547.876 | 0.961 | 15076.554 |
| 9 | 104246.295 | 105679.834 | 105025.208 | 0.927 | 13799.655 |
| 10 | 103659.291 | 105252.885 | 104525.17 | 0.914 | 12106.694 |

AIC: Akaike information criteria, BIC: Bayesian information criterion aBIC: adjusted Bayesian information criterion


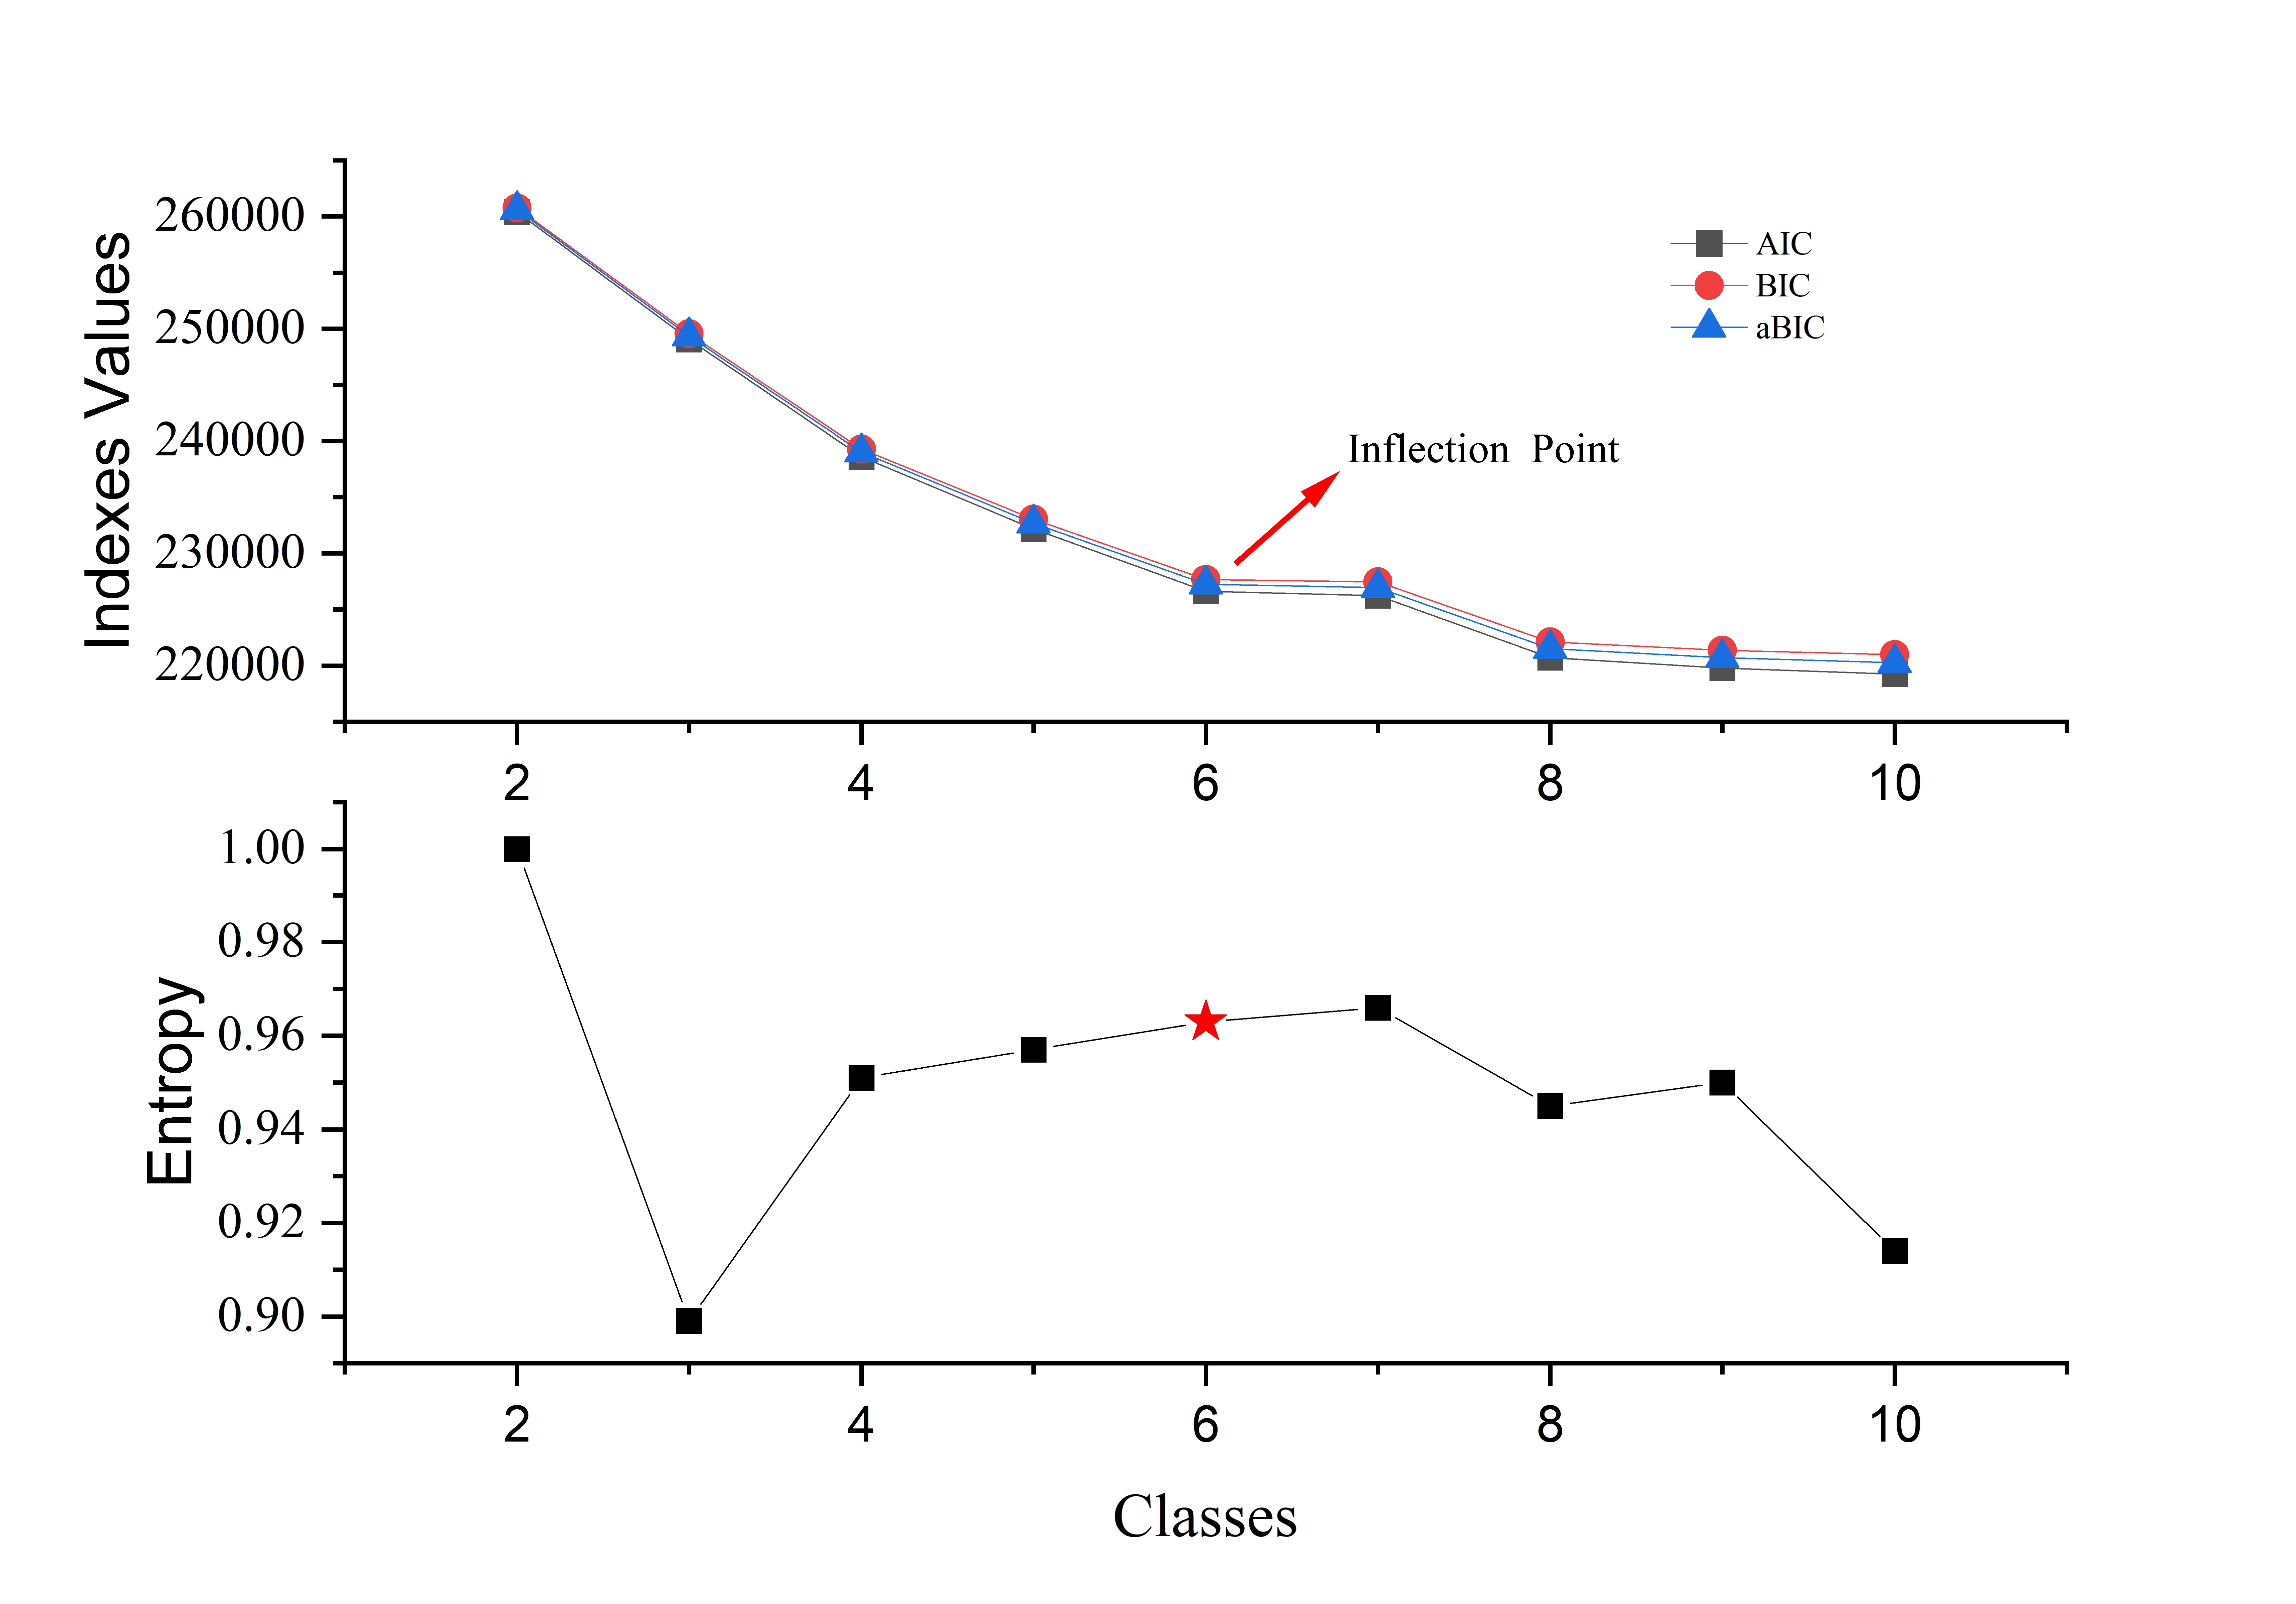


**Figure S1**. Visualize of the LCA of family context selection indexes among CFPS 2010

LCA: Latent Class Analysis

CFPS: China Family Panel Studies

AIC: Akaike information criteria, BIC: Bayesian information criterion aBIC: adjusted Bayesian information criterion

arrow: the point of inflection point; star: optimal value of entropy.
